# Supplementary material for: A counter electrode based on hollow spherical particles of polyaniline for a dye-sensitized solar cell
Source: Royal Society of Chemistry journal article supplement (doi:10.1039/c2jm32316h), 2012-01-01
Supplement: c2jm32316h.pdf [file c2jm32316h.pdf]

## Supplementary information

### A counter electrode based on hollow spherical particles of polyaniline for a dye-sensitized solar cell

Kuan-Chieh Huang,<sup>a</sup> Chih-Wei Hu,<sup>a</sup> Chen-Ya Tseng,<sup>a</sup> Chen-Yu Liu,<sup>a</sup> Min-Hsin Yeh,<sup>a</sup> Hung-Yu Wei,<sup>b</sup> Chun-Chieh Wang,<sup>a</sup> R. Vittal,<sup>a</sup> Chih-Wei Chu<sup>c,d</sup> and Kuo-Chuan Ho<sup>\*a,b</sup>

<sup>a</sup> Department of Chemical Engineering, National Taiwan University, Taipei 10617, Taiwan

<sup>b</sup> Institute of Polymer Science and Engineering, National Taiwan University, Taipei 10617, Taiwan

<sup>c</sup> Research Center for Applied Sciences, Academia Sinica, Taipei 11529, Taiwan

<sup>d</sup> Department of Photonics, National Chiao Tung University, Hsinchu 300, Taiwan

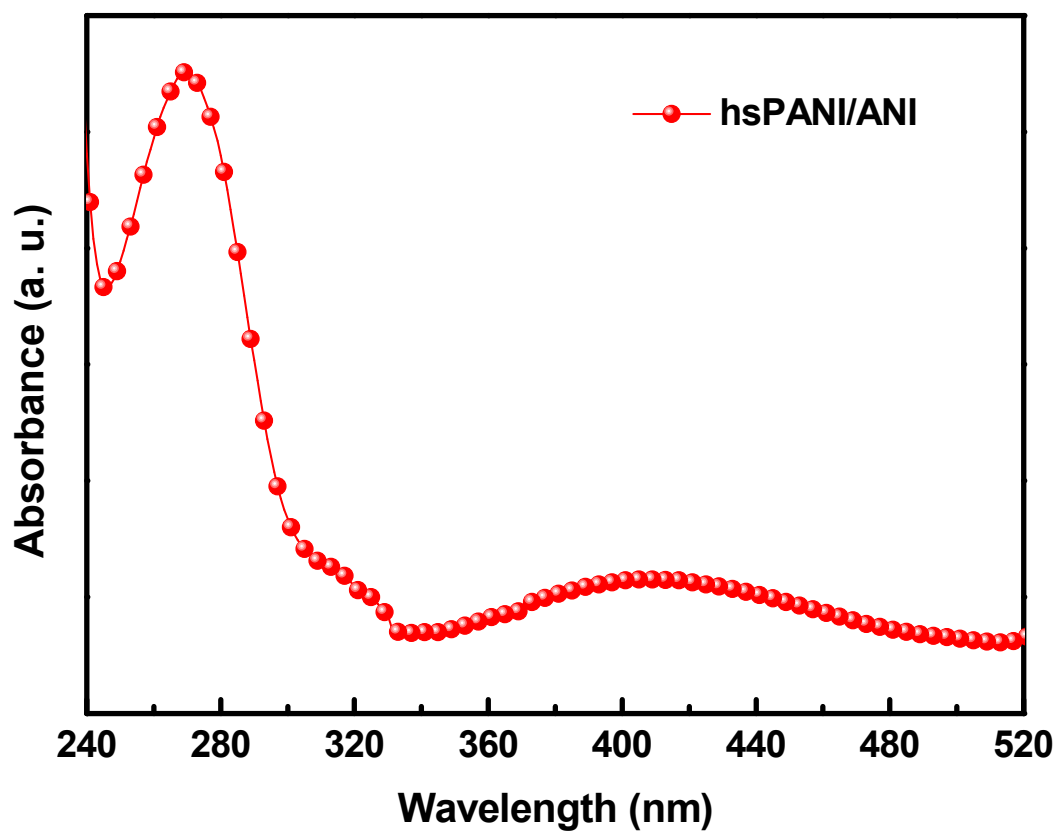

Fig. S1 UV/Vis absorption spectrum of hsPANI/ANI particles in water.

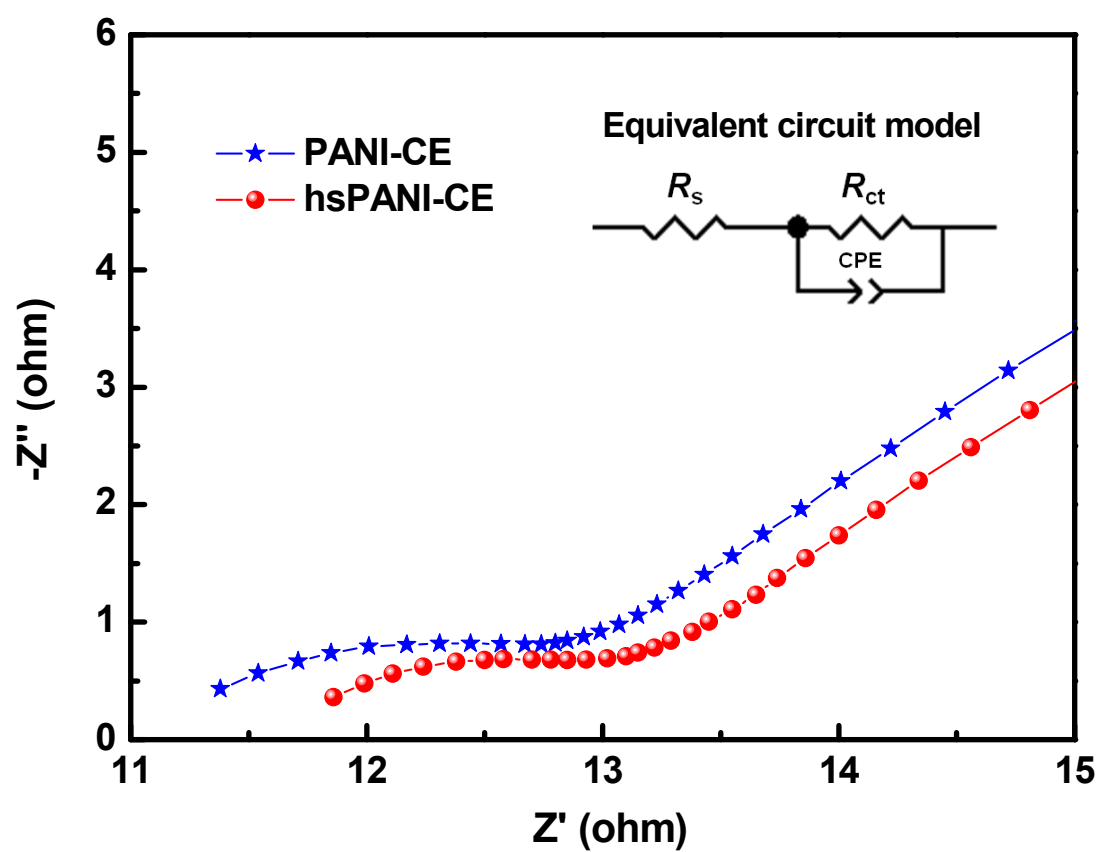

**Fig. S2** EIS spectra of the symmetric cells with PANI-CE and hsPANI-CE. The inset shows the corresponding equivalent circuit model.
